# Supplementary material for: Valorization of cellulose and waste paper to graphene oxide quantum dots
Source: Royal Society of Chemistry journal article supplement (doi:10.1039/c5ra01805f), 2015-01-01
Supplement: c5ra01805f1.pdf [file c5ra01805f1.pdf]

# Valorization of cellulose and waste paper to graphene oxide quantum dots

*Karin H. Adolfsson, Salman Hassanzadeh and Minna Hakkarainen\**

Department of Fiber and Polymer Technology, KTH Royal Institute of Technology, SE-100 44  
Stockholm, Sweden, e-mail: minna@kth.se

## Contents

|                                                        |   |
|--------------------------------------------------------|---|
| FTIR study of $\alpha$ -cellulose and CNs .....        | 2 |
| AFM study of bulk CNs and GOQDs.....                   | 2 |
| TGA studies .....                                      | 4 |
| TEM studies.....                                       | 5 |
| Optical and fluorescence properties.....               | 6 |
| FTIR and XRD studies of waste paper, CN and GOQD ..... | 7 |

### FTIR study of $\alpha$ -cellulose and CN

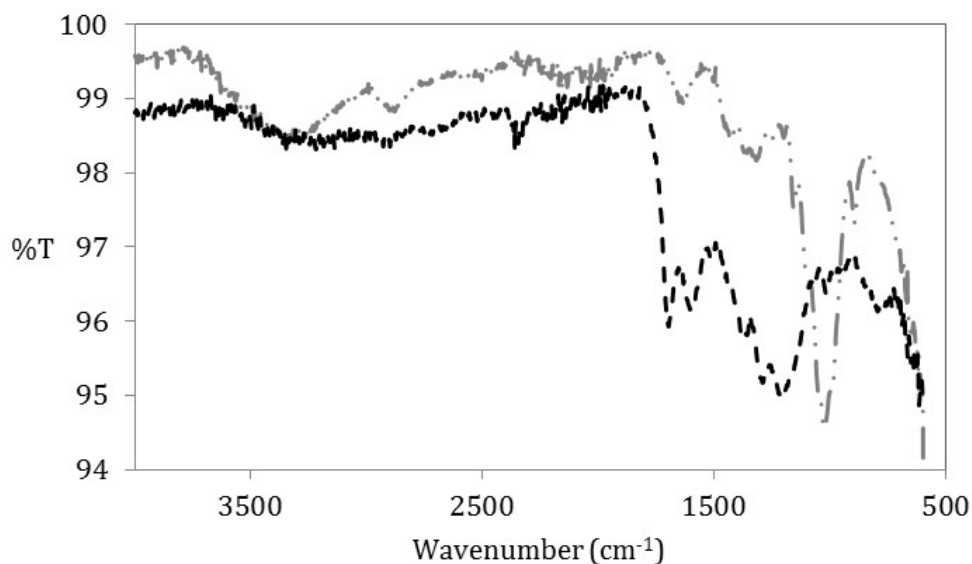

**Figure S1.** FTIR-spectra of  $\alpha$ -cellulose (— · —) and CN (— —).

### AFM study of bulk CN and GOQD

Surface character, average size and thickness of GOQD-60 were further studied and compared to CN. In figure 5, AFM images shows that CN consists of spherically shaped species in accordance with SEM. The sphere sizes were polydisperse with mainly larger particles in  $\mu\text{m}$  size. GOQD on the other hand were shown to consist of large sheets with a few bumps due to functional groups such as hydroxyl and carboxyl. Possibly, the dots overlapped due to strong interaction and formed larger domains of GOQD held together by intermolecular forces.

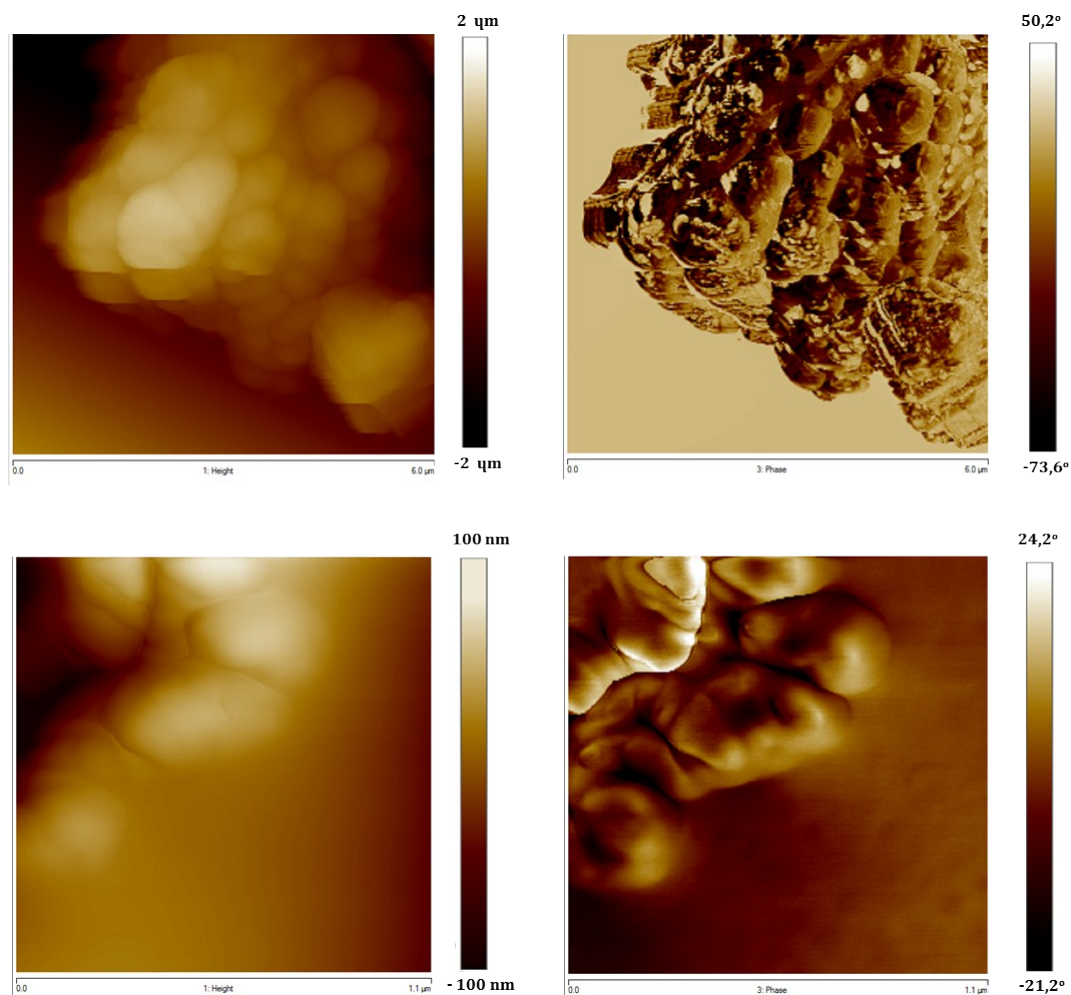

**Figure S2.** AFM images given in height and phase mode respectively of a-b) CN and c-d) GOQD-60 bulk solid form.

## TGA studies

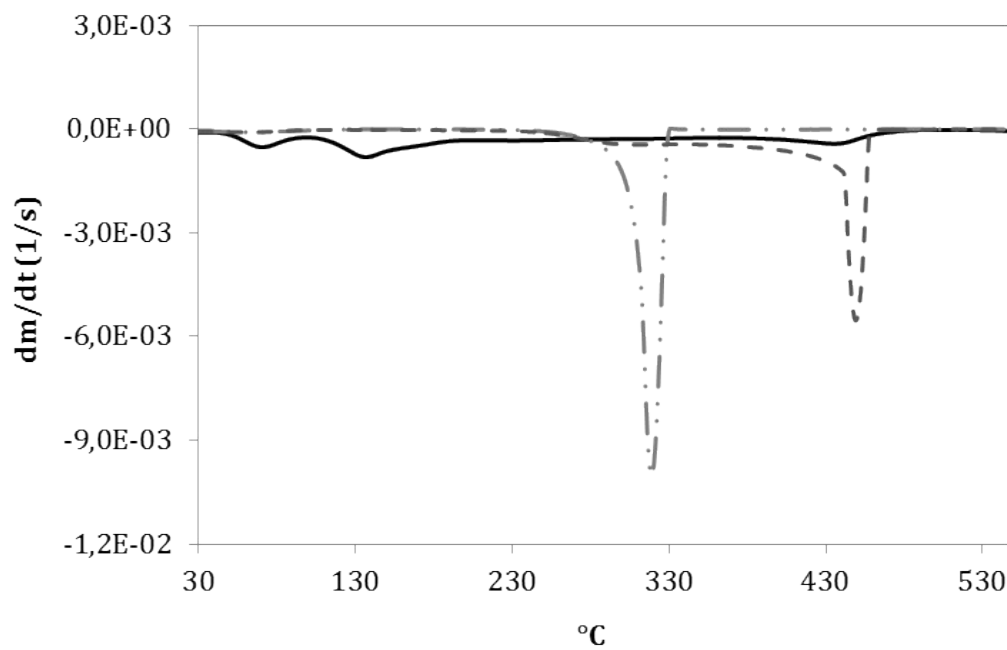

**Figure S3.** DTG curves of  $\alpha$ -cellulose (— · ·), CN (— —) and GOQD -60 (—) in O<sub>2</sub> atmosphere.

## TEM studies

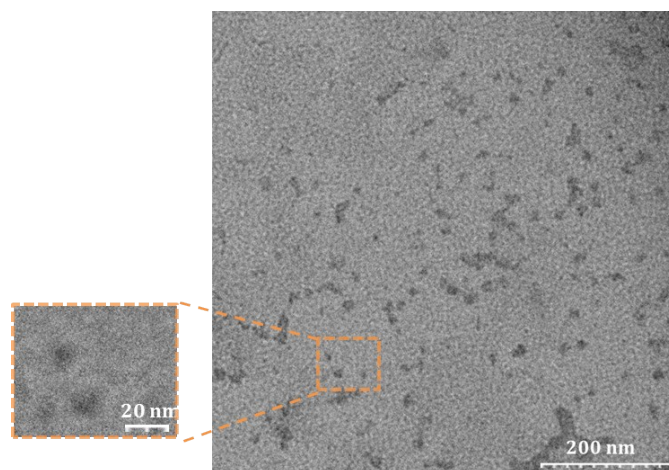

**Figure S4.** Sheets of GOQD-60 visualized by HR-TEM. The sample was prepared at a concentration of 0.05 mg/ml in deionized H<sub>2</sub>O.

## Optical and fluorescence properties

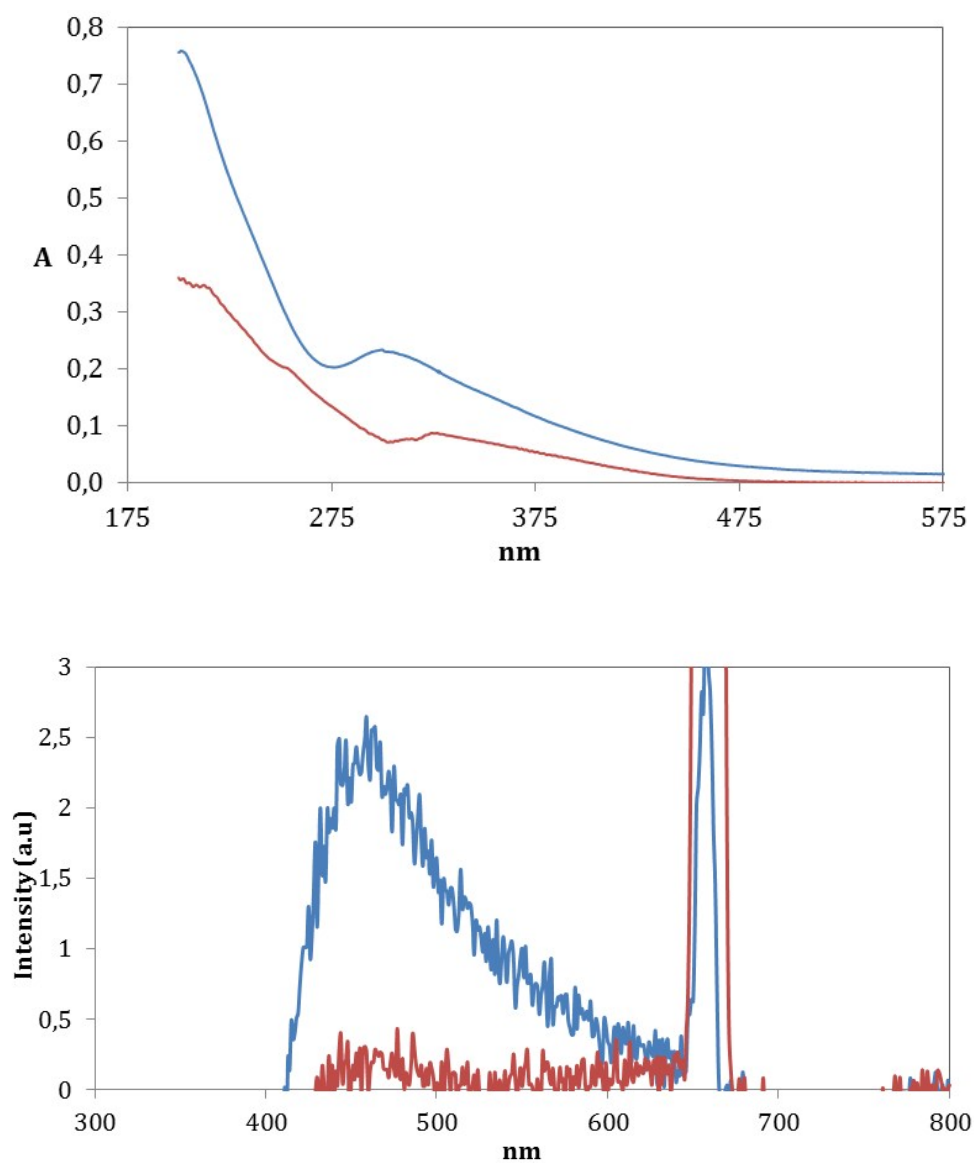

**Figure S5.** Optical (UV-Vis) (top) and fluorescence properties (below) of GOQD (0.05 mg/ml in deionized H<sub>2</sub>O, exc. 330 nm) at different reaction times. GOQD-30 (blue), GOQD-60 (red).

## FTIR and XRD studies of waste paper, CN and GOQD

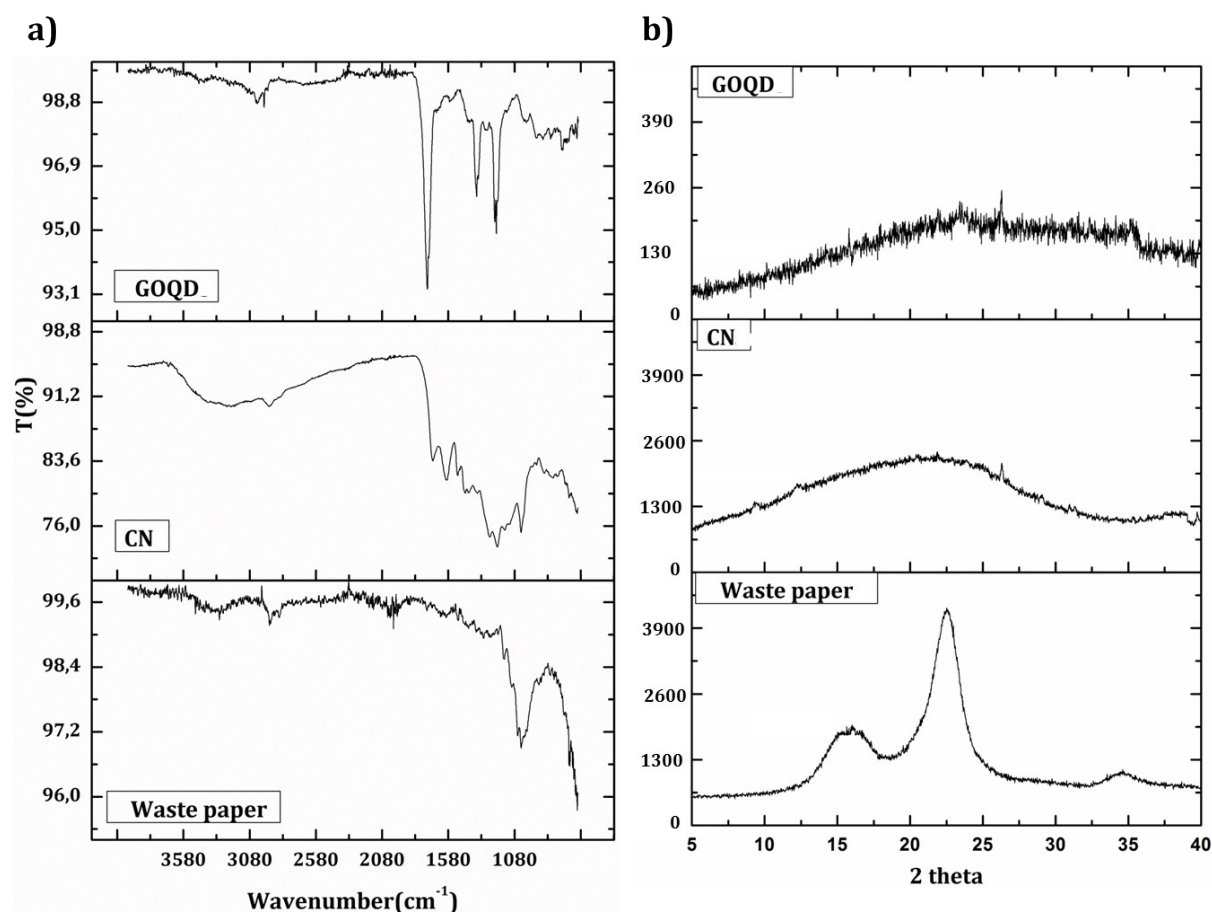

**Figure S6.** a) FTIR spectra and b) XRD spectra of waste paper, CN and GOQD-30.
